# Supplementary material for: Loss of Function Mutation in the Palmitoyl-Transferase HHAT Leads to Syndromic 46,XY Disorder of Sex Development by Impeding Hedgehog Protein Palmitoylation and Signaling
Source: PubMed Central journal article supplement (PMC4006744; doi:10.1371/journal.pgen.1004340), 2014-05-01

# SUPPLEMENTARY FIGURE 3

XY, E11.5

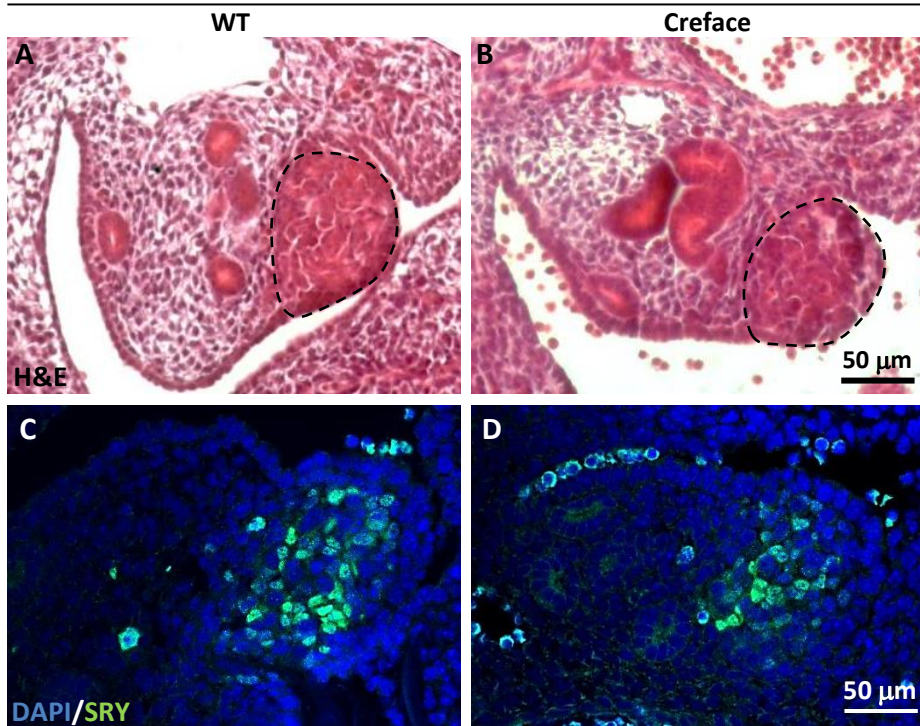

Supplement: pgen.1004340.s003.pdf [file pgen.1004340.s003.pdf]
